# Supplementary material for: Exploring the molecular mechanism of Xuebifang in the treatment of diabetic peripheral neuropathy based on bioinformatics and network pharmacology
Source: Front Endocrinol (Lausanne). 2024 Feb 8;15:1275816. doi: 10.3389/fendo.2024.1275816 (PMC10881818; doi:10.3389/fendo.2024.1275816)
Supplement: Supplementary file 7 [file Table_7.xlsx]

## Sheet: R.DEGKEGG
ID	Description	GeneRatio	BgRatio	pvalue	p.adjust	qvalue	geneID	Count
hsa04621	NOD-like receptor signaling pathway	85/2157	186/8386	2.1085e-09	7.0424e-07	5.70406e-07	84674/22900/58484/4938/4939/91662/4793/596/9447/118429/3428/11035/3455/59082/7099/2633/56919/4615/3661/10910/2635/7128/23710/8737/1536/5603/79671/3709/4210/140609/1432/3708/834/8767/5027/3551/11345/6772/6041/331/8772/7297/837/9051/5970/7124/64127/114769/5594/29108/4792/55669/2919/6773/51393/152138/7419/10379/5580/199713/7295/24145/3445/51135/3320/6885/3553/222545/23118/838/6347/3716/79792/64170/2…	85
hsa04625	C-type lectin receptor signaling pathway	48/2157	104/8386	4.79053e-06	0.000621581	0.000503455	4775/26253/5530/5058/91860/4772/8503/5971/5743/64581/338339/5603/3709/1432/3708/834/9261/3551/6772/2207/5291/602/23365/5970/7124/5336/5594/29108/4792/810/6773/5781/6714/10379/5580/4776/801/3553/6850/8915/10000/64170/3593/1263/51266/1959/5894/93978	48
hsa04380	Osteoclast differentiation	56/2157	128/8386	6.24044e-06	0.000621581	0.000503455	11024/29760/2353/2213/5530/79168/3455/1436/4772/7132/140885/8503/3727/5971/8878/3460/5603/1432/4689/3551/6772/4688/126014/7297/5608/5291/5970/7124/5336/5604/5594/3690/4792/7046/6773/3554/1385/10288/4286/10379/3932/10859/6885/3553/6850/23118/10000/11006/3716/7048/353514/2274/11025/4982/6688/54209	56
hsa04668	TNF signaling pathway	51/2157	114/8386	7.44408e-06	0.000621581	0.000503455	9586/6416/2353/843/11035/7132/4318/8503/7128/8737/5743/5603/8837/8717/1432/7424/3383/3551/331/9252/8772/5608/5291/602/148327/5970/4049/7124/64127/6374/5604/5594/197259/4792/9530/2919/4314/840/1385/355/6885/3553/83737/23118/6347/10000/84699/3600/3627/1326/64764	51
hsa05417	Lipid and atherosclerosis	84/2157	215/8386	9.36754e-06	0.000625751	0.000506833	3303/4775/3305/6416/57534/9475/5906/317/929/839/2353/6256/596/5530/7157/3717/817/6403/91860/7099/8743/4772/7132/4615/3661/4318/8503/1536/5603/3304/7097/1965/1432/3708/834/3383/4689/958/3551/4688/4780/23643/5608/5291/9451/5970/959/7124/356/5452/5594/29108/4792/810/2919/818/948/4314/840/6714/4973/355/637/3445/2081/51135/801/3320/6885/3553/10333/5747/23118/6347/4067/10000/4846/6648/3949/3593/1649/25…	84
hsa05163	Human cytomegalovirus infection	86/2157	225/8386	1.97472e-05	0.00109926	0.000890355	1234/9586/4775/3570/1232/9475/5925/5530/7157/1230/3579/91860/5567/2002/4772/7132/3661/113/8503/115/2791/8737/5743/108/5603/6667/3709/1398/2782/8717/1432/3708/5881/3551/9826/5732/8772/5608/11214/5291/51764/23365/6891/54331/148327/5970/7124/6009/356/5604/5594/1019/3690/4792/810/5568/6093/3554/1385/5734/5731/2770/6714/7248/2185/355/637/3445/4776/5880/801/3553/5747/6198/6347/10000/59345/3716/10681/84…	86
hsa05162	Measles	58/2157	139/8386	2.44462e-05	0.00116643	0.000944762	3303/3305/4938/4939/317/2353/4793/2213/596/894/7157/51284/4600/3455/7099/4615/3661/8503/7128/64135/3560/3304/6777/7097/1965/8717/4179/3561/3551/6772/8772/7297/5291/9451/5970/356/4478/1019/4792/6504/6773/10379/355/54106/637/3445/51135/6885/3553/23118/10000/3716/4599/3593/1027/3441/3440/8667	58
hsa04662	B cell receptor signaling pathway	39/2157	84/8386	3.08617e-05	0.00117519	0.000951852	4775/118788/11024/27071/29760/2353/4793/1380/2213/5530/79168/974/4772/8503/971/5881/3551/25780/5291/4794/5970/5336/5604/5594/4792/10288/10859/5777/930/5880/6850/8915/4067/10000/11006/353514/11025/973/5894	39
hsa05135	Yersinia infection	57/2157	137/8386	3.16667e-05	0.00117519	0.000951852	58484/10092/4775/6416/9475/8395/2353/10096/8874/7099/4772/4615/9815/3661/8503/6197/8935/6195/23396/3676/57180/5603/1398/4210/7456/1432/834/5881/3551/10097/9844/5608/5291/23365/5970/81873/7124/5604/5594/29108/4792/6093/6714/3932/2185/5880/51135/6885/3553/5747/23118/6347/10000/1399/10093/5829/2335	57
hsa05161	Hepatitis B	63/2157	162/8386	0.000139127	0.00464685	0.00376376	9586/4775/6416/5925/317/2353/596/843/7157/3717/7529/7099/2002/4772/4615/3661/4318/8503/64135/4214/5603/6777/7097/1432/3551/6772/8772/7297/5608/5291/6778/148327/5970/7124/356/5604/5594/4792/7046/6773/1385/7419/6714/2185/890/355/637/3445/4776/51135/6885/23118/10000/3716/84699/1642/8900/7048/1959/3441/5894/3440/64764	63
hsa04620	Toll-like receptor signaling pathway	44/2157	104/8386	0.000155017	0.00470688	0.00381238	7100/6416/54472/929/2353/51284/3455/7099/4615/3661/51311/8503/8737/5603/7097/1432/958/3551/6772/23643/8772/5608/5291/7096/942/5970/7124/5604/5594/4792/54106/3445/51135/6885/3553/10333/23118/10000/3593/3441/3627/6696/3440/1326	44
hsa05160	Hepatitis C	60/2157	157/8386	0.00034375	0.00930396	0.00753583	7532/5925/4938/5516/4939/317/6256/7157/4600/3455/7529/91543/7132/3661/8503/8737/1364/137075/1965/8837/8717/7533/3551/6772/6041/8772/7297/5291/9451/5970/7124/356/5604/5594/1019/4792/10197/6773/10379/1950/355/5515/637/23562/3445/10062/55844/10000/3716/3949/4599/3434/51208/3441/5520/3627/439996/5894/3440/100506658	60
hsa04130	SNARE interactions in vesicular transport	18/2157	33/8386	0.000384543	0.00930396	0.00753583	9554/8417/10282/6809/10228/55014/9570/143187/8773/662/2054/8674/415117/8676/6845/9341/9342/112755	18
hsa05132	Salmonella infection	88/2157	249/8386	0.000403068	0.00930396	0.00753583	7100/58484/10092/6416/9475/8655/929/2353/140735/10096/596/26263/1434/11035/65082/5058/7099/81027/8743/5869/55770/7132/10810/4615/3831/302/8737/1781/57180/5603/4074/79443/11258/7097/8717/1432/834/8767/3551/6500/23191/10097/23643/8772/9844/388/837/5608/5291/10627/112574/3071/5970/81873/3799/7124/5604/5594/29108/197259/4792/5788/840/10398/26999/83439/10640/54106/7295/51135/3320/6885/3553/79026/10333…	88
hsa05418	Fluid shear stress and atherosclerosis	54/2157	139/8386	0.000417843	0.00930396	0.00753583	6416/2353/596/5175/7157/4208/91860/7132/5154/4318/8503/90/5562/4259/8878/5603/4258/4257/9817/1432/3383/5881/3551/4688/4780/1843/5608/5291/5970/7124/3690/810/3554/6714/5563/4205/7850/7295/5880/387082/801/3320/6885/3553/5747/7341/6347/2948/10000/6382/4846/657/858/857	54
hsa05167	Kaposi sarcoma-associated herpesvirus infection	71/2157	194/8386	0.000463003	0.0095206	0.0077113	1234/4775/3055/6416/1232/5925/2353/1827/5530/131450/7157/3717/1230/146850/3455/91860/4772/7132/3661/8503/22863/2791/5743/5603/3709/1237/2782/8717/1432/3708/3383/9261/3551/6772/8772/7297/5608/5291/942/51764/54331/5970/5336/5604/5594/1019/4792/810/2919/6773/1385/83439/6714/10379/355/637/3445/4776/801/6850/4067/10000/59345/3716/10681/64422/1233/81631/3441/5894/3440	71
hsa04071	Sphingolipid signaling pathway	48/2157	121/8386	0.000492811	0.0095206	0.0077113	2205/9475/56848/5516/8698/2206/596/7157/5527/5337/7132/259230/8503/81537/1901/171546/9517/5603/4363/5728/1903/8717/1432/5881/10558/28227/2207/5291/166929/8439/5970/7124/5604/5594/6093/29956/2770/165679/5515/637/5880/55844/8879/10000/4846/5529/5520/5894	48
hsa00052	Galactose metabolism	17/2157	31/8386	0.000513086	0.0095206	0.0077113	2720/7360/5214/55276/92579/2595/2592/8972/5213/2717/2584/3099/3101/5236/80201/130589/3906	17
hsa04062	Chemokine signaling pathway	70/2157	192/8386	0.000572992	0.0100726	0.0081584	1524/1234/3055/1232/9475/5906/729230/4793/3717/1230/146850/3579/5058/5567/10663/113/8503/115/2791/108/1398/6777/1237/2782/5881/3551/1235/6772/9844/5291/2268/51764/10235/5473/54331/5970/5336/6374/5604/2870/5594/4792/2919/6773/5568/6093/6363/2770/6714/7074/5580/2185/3577/56288/5880/6011/5747/399694/6347/4067/10000/59345/10681/1399/1233/25759/5829/6355/3627/5894	70
hsa04140	Autophagy - animal	54/2157	141/8386	0.000626928	0.0104697	0.00848002	84938/5516/10533/596/203228/10645/81671/5567/3920/8503/5562/22863/54541/23710/8878/23192/55014/5728/1965/8837/3708/11345/5588/23130/55578/29982/5291/1612/9451/6009/5604/5594/55062/5568/116442/7248/5580/5563/3146/5515/55255/2081/6885/58476/10670/6198/10000/84971/64422/89849/8660/9342/81631/5894	54
hsa04144	Endocytosis	87/2157	251/8386	0.000876417	0.0139392	0.0112902	3303/1234/10890/10092/10015/3305/137492/8395/8411/867/9765/10096/9135/57403/55048/55737/11311/10617/163/3579/6642/26052/5337/8853/5869/9815/5371/10193/2060/8766/23550/23396/30845/3560/57180/3304/1601/7456/50807/3561/79643/23362/10097/26119/11031/80230/64744/64411/84552/51510/10564/81873/4087/3799/2870/377/161/10254/9798/7046/57132/2352/6714/60682/3482/84313/3577/56288/116987/1211/830/27243/6011/8…	87
hsa00520	Amino sugar and nucleotide sugar metabolism	23/2157	49/8386	0.00105892	0.0160763	0.0130211	7358/55577/2585/80896/7360/10007/55276/55907/8790/3074/1727/2592/6675/5373/2673/2584/3099/3101/51167/29926/5973/5236/80201	23
hsa05152	Tuberculosis	65/2157	180/8386	0.00117854	0.0171145	0.013862	56848/317/929/8411/2213/26253/596/5530/843/3717/1378/817/91860/7099/1379/5869/7132/4615/3920/64581/3460/5603/7097/8717/1432/8767/4800/6772/4261/8772/2207/7096/23365/5970/5994/7124/64127/5594/810/818/1385/6714/54106/9114/637/3445/51135/801/3553/10333/6850/5993/8915/10000/3716/64170/1520/3593/820/1263/3687/3441/5894/3440/3119	65
hsa05164	Influenza A	62/2157	171/8386	0.00134889	0.0187721	0.0152046	4938/4939/317/4793/3717/51284/4600/3455/7099/91543/8743/7132/4615/3661/5371/8503/64135/8766/3460/79671/1965/8717/834/3383/7514/3551/6772/4261/6041/8772/7297/5291/55916/5970/7124/356/5604/5594/29108/1019/4792/5644/6773/10379/402569/355/637/2224/3445/51135/3553/6347/10000/3716/4599/3593/3441/3627/5894/292/3440/3119	62
hsa04151	PI3K-Akt signaling pathway	116/2157	354/8386	0.00148113	0.0194158	0.015726	9586/3570/7532/118788/8115/10161/5516/6256/596/672/894/7157/3717/5527/146850/3455/7529/7099/1436/5154/8823/8503/5562/2997/54541/2791/6446/3560/63923/92579/3676/4803/26281/200186/2782/7097/1944/5728/7424/7533/3561/3551/10018/7010/2149/28227/5291/5934/5106/3575/51764/54331/148327/5970/6009/3655/356/2846/5604/1969/5594/7057/3675/1019/3690/5008/3913/4602/80310/1385/7248/117145/1950/5563/5515/3445/930…	116
hsa04210	Apoptosis	51/2157	136/8386	0.00151141	0.0194158	0.015726	317/839/2353/596/843/1519/7157/1075/8743/7132/8503/8737/1616/3709/4803/9131/1965/8837/8717/3708/3551/10018/331/8772/8739/5291/5783/9451/5970/2021/7124/356/1439/5604/5594/4792/840/4001/1677/355/637/2081/5366/10000/823/1520/4170/1649/1521/5894/597	51
hsa05235	PD-L1 expression and PD-1 checkpoint pathway in cancer	36/2157	89/8386	0.00158867	0.0196525	0.0159177	4775/2353/4793/5530/3717/7099/10538/4772/4615/8503/3460/5603/7097/5728/1432/3551/6772/5588/55509/5608/5291/4794/5970/5604/5594/4792/5781/3932/1950/5777/54106/4215/6198/10000/3716/5894	36
hsa05140	Leishmaniasis	32/2157	77/8386	0.00167798	0.0200159	0.0162121	2353/4793/3717/1378/7099/1379/2002/4615/5743/3460/3676/1536/5603/7097/1432/4689/6772/4688/5970/7124/5594/4792/5777/51135/6885/3553/23118/3716/3565/3593/1917/3119	32
hsa05134	Legionellosis	25/2157	57/8386	0.00216517	0.0245826	0.0199109	7100/3303/58484/3305/317/929/9554/1378/7099/1379/4615/3304/23786/7097/834/5970/7124/29108/4792/2919/840/3553/81876/3593/1917	25
hsa01250	Biosynthesis of nucleotide sugars	18/2157	37/8386	0.00220802	0.0245826	0.0199109	7358/55577/2585/7360/55276/55907/23483/8790/2592/6675/5373/2673/2584/3099/3101/29926/5236/80201	18
hsa05170	Human immunodeficiency virus 1 infection	73/2157	212/8386	0.00266684	0.0287331	0.0232726	1234/4775/2353/596/5530/5058/91860/7099/130340/1174/4772/7132/4615/3661/8503/2791/8737/200316/8451/5603/3709/1398/2782/7097/8717/1432/3708/5881/3551/8065/162/6500/8772/5608/5291/684/5062/8905/51764/6891/54331/5970/7124/5336/356/5604/5594/4792/810/2770/2185/355/60489/637/3445/4776/5880/25939/51135/801/6885/5747/6198/23118/10000/59345/10681/1642/1399/5829/3441/5894/3440	73
hsa04931	Insulin resistance	41/2157	108/8386	0.00323788	0.0337953	0.0273728	9586/11000/7132/8503/5562/6197/2997/6517/6195/92579/5836/10999/200186/5728/3551/5588/51422/5291/5106/148327/5970/7124/4792/2673/948/1385/5781/5580/5563/6945/10062/11001/6198/10000/4846/57761/84699/79660/8660/5507/64764	41
hsa05130	Pathogenic Escherichia coli infection	68/2157	197/8386	0.00342331	0.034648	0.0280635	7100/10092/9475/2353/4793/10096/5058/7099/81027/8743/7132/10810/4615/8737/1364/57180/5603/137075/7456/8717/1432/834/3551/9826/23191/2149/10097/8772/837/5062/23365/4627/3071/5970/81873/7124/356/10061/2846/5594/29108/4792/6093/7009/3554/840/8440/26999/5781/6714/355/5777/4643/23562/51135/6885/3553/9871/9266/23118/4542/2017/10093/84617/51208/2597/1902/100506658	68
hsa04623	Cytosolic DNA-sensing pathway	30/2157	75/8386	0.00456838	0.0441964	0.0357972	4793/9447/11035/3661/8737/4210/81030/834/3551/171568/8772/51728/9533/5970/51082/29108/197259/4792/11128/840/55703/3445/25939/3553/5437/79792/3441/58511/3627/3440	30
hsa04217	Necroptosis	56/2157	159/8386	0.00463206	0.0441964	0.0357972	5321/596/3717/11035/3455/817/7099/8743/7132/7128/8737/8878/3460/5836/1536/6777/283748/9131/8837/8717/81030/834/79643/6772/331/8772/7297/51510/6778/7124/356/29108/197259/818/6773/57132/7419/10379/355/3146/637/3445/27243/3320/3553/3716/823/5481/8605/25978/10616/27005/2752/3441/292/3440	56
hsa04920	Adipocytokine signaling pathway	28/2157	69/8386	0.00476368	0.0441964	0.0357972	4793/6256/3717/10645/51703/7132/5562/6517/92579/8717/3551/5588/2181/51422/5106/2182/4794/5970/7124/4792/9370/948/79602/5781/5563/2180/10000/8660	28
hsa03460	Fanconi anemia pathway	23/2157	54/8386	0.00500582	0.0451191	0.0365446	80010/29935/29089/672/5395/51455/5889/51426/5888/84464/2188/55120/2072/11201/80198/5980/7156/6118/6117/22909/57599/7398/116028	23
hsa04064	NF-kappa B signaling pathway	39/2157	104/8386	0.00513331	0.0451191	0.0365446	929/29760/596/5328/7099/8740/7132/4615/7128/8737/5971/5743/8837/8717/3383/958/3551/5588/331/23643/5970/959/4049/7124/10673/5336/4792/2919/3554/6363/3932/51135/6885/3553/6850/8915/23118/4067/597	39
hsa04146	Peroxisome	32/2157	82/8386	0.00540167	0.0462605	0.0374691	23417/3295/3417/51/8504/5052/847/51703/3155/23600/55711/5825/196743/6342/8310/54677/2181/83594/1891/2182/55825/4358/84188/390916/2180/10005/11001/225/5189/6648/5193/5826	32
hsa04611	Platelet activation	45/2157	124/8386	0.00566513	0.0473038	0.0383141	9475/54518/5906/2811/5321/146850/5567/113/8503/115/7408/7094/83706/108/5603/3709/283748/1432/3708/5742/8773/2149/2207/5291/6916/10627/4638/23365/10235/64805/5336/5594/3690/5568/6093/2770/6714/9002/84876/6850/4067/10000/2977/4846/8605	45
